# Supplementary material for: The Molecular Basis for the Endocytosis of Small R-SNAREs by the Clathrin Adaptor CALM
Source: PubMed Central journal article supplement (PMC3267021; doi:10.1016/j.cell.2011.10.038), 2011-11-23
Supplement: mmc1.pdf [file mmc1.pdf]

**Table S1. Data Collection and Refinement Statistics**

Numbers in parentheses refer to the appropriate outer shell.

| <b>Data Collection</b>                                       | <b>CALM<sub>ANTH(1-289)</sub></b>                      | <b>CALM<sub>ANTH(1-264)</sub></b>                                         | <b>CALM<sub>ANTH(1-264):VAMP8(11-41)</sub></b>                              |
|--------------------------------------------------------------|--------------------------------------------------------|---------------------------------------------------------------------------|-----------------------------------------------------------------------------|
| Beamline                                                     | Diamond I04                                            | Diamond I03                                                               | Diamond I03                                                                 |
| Detector                                                     | ADSC Q315 CCD                                          | ADSC Q315 CCD                                                             | ADSC Q315 CCD                                                               |
| Wavelength (Å)                                               | 0.9763                                                 | 0.9763                                                                    | 0.9763                                                                      |
| Resolution limits (Å)                                        | 73.5–1.8<br>(1.85–1.80)                                | 60.5–1.7<br>(1.74–1.70)                                                   | 91.1–2.0<br>(2.08–2.03)                                                     |
| Space group                                                  | <i>P</i> 2 <sub>1</sub> 2 <sub>1</sub> 2 <sub>1</sub>  | <i>C</i> 2                                                                | <i>C</i> 2                                                                  |
| Unit cell dimensions (Å, °)                                  | <i>a</i> = 73.5<br><i>b</i> = 78.3<br><i>c</i> = 120.2 | <i>a</i> = 95.9<br><i>b</i> = 121.1<br><i>c</i> = 62.4<br>$\beta$ = 110.7 | <i>a</i> = 161.1<br><i>b</i> = 100.3<br><i>c</i> = 104.0<br>$\beta$ = 118.9 |
| Unique reflections                                           | 64,198 (4,652)                                         | 72,568 (5,397)                                                            | 93,133 (6,910)                                                              |
| Redundancy                                                   | 14.1 (14.5)                                            | 4.3 (4.3)                                                                 | 3.7 (3.7)                                                                   |
| Completeness (%)                                             | 98.9 (98.1)                                            | 99.4 (99.9)                                                               | 99.7 (99.8)                                                                 |
| $\langle I/\sigma(I) \rangle$                                | 14.4 (3.1)                                             | 9.8 (2.1)                                                                 | 10.0 (1.9)                                                                  |
| $R_{\text{merge}}^a$                                         | 0.100 (0.862)                                          | 0.071 (0.484)                                                             | 0.079 (0.731)                                                               |
| $R_{\text{meas}}^b$                                          | 0.104 (0.893)                                          | 0.081 (0.553)                                                             | 0.093 (0.855)                                                               |
| $R_{\text{pim}}^c$                                           | 0.028 (0.231)                                          | 0.038 (0.264)                                                             | 0.048 (0.440)                                                               |
| <b>Refinement</b>                                            |                                                        |                                                                           |                                                                             |
| Resolution limits (Å)                                        | 40.0–1.8<br>(1.83–1.80)                                | 35.5–1.7<br>(1.72–1.70)                                                   | 45.6–2.0<br>(2.05–2.03)                                                     |
| Reflections in working set                                   | 64,141 (2,629)                                         | 72,462 (2,670)                                                            | 93,106 (2,933)                                                              |
| Reflections in test set                                      | 3,237 (115)                                            | 3,652 (138)                                                               | 4,667 (162)                                                                 |
| $R_{\text{work}}$ (%) <sup>d</sup>                           | 0.182 (0.301)                                          | 0.170 (0.288)                                                             | 0.182 (0.294)                                                               |
| $R_{\text{free}}$ (%) <sup>e</sup>                           | 0.216 (0.347)                                          | 0.191 (0.300)                                                             | 0.199 (0.365)                                                               |
| Number of molecules/complexes per asymmetric unit            | 2                                                      | 2                                                                         | 3                                                                           |
| Number of atoms (protein/water/other <sup>f</sup> )          | 4,417/415/0                                            | 4,225/444/0                                                               | 6,844/473/8                                                                 |
| Residues in Ramachandran favored region (%)                  | 98.7                                                   | 98.3                                                                      | 99.2                                                                        |
| Ramachandran outliers (%)                                    | 0.0                                                    | 0.0                                                                       | 0.0                                                                         |
| r.m.s.d bond lengths (Å) <sup>g</sup>                        | 0.009                                                  | 0.010                                                                     | 0.008                                                                       |
| r.m.s.d bond angles (°) <sup>g</sup>                         | 1.077                                                  | 1.110                                                                     | 0.911                                                                       |
| Average <i>B</i> factors (Å <sup>2</sup> ) (protein/solvent) | 35.1/42.0                                              | 31.1/40.68                                                                | 41.2/46.8                                                                   |

<sup>a</sup> $R_{\text{merge}} = \frac{\sum_{\text{hkl}} \sum_i |I(\text{hkl};i) - \langle I(\text{hkl}) \rangle|}{\sum_{\text{hkl}} \sum_i I(\text{hkl};i)}$ , where  $I(\text{hkl};i)$  is the intensity of an individual measurement of a reflection and  $\langle I(\text{hkl}) \rangle$  is the average intensity of that reflection.

<sup>b</sup> $R_{\text{meas}}$  is the redundancy-independent merging  $R$  factor (Diederichs and Karplus, 1997).

<sup>c</sup> $R_{\text{pim}}$  is the precision-indicating merging  $R$  factor (Weiss et al., 1998).

<sup>d</sup> $R_{\text{work}} = \frac{\sum_{\text{hkl}} (|F_{\text{obs}}| - |F_{\text{calc}}|)}{\sum_{\text{hkl}} |F_{\text{obs}}|}$ , where  $|F_{\text{obs}}|$  and  $|F_{\text{calc}}|$  are the observed and calculated structure factor amplitudes, respectively.

<sup>e</sup> $R_{\text{free}}$  equals  $R$  of the cross-validation (test) set, 5% of the data removed prior to refinement.

<sup>f</sup>Other indicates  $\text{PO}_4^{3-}$  ions.

<sup>g</sup>r.m.s.d. is root mean square deviation from ideal geometry.
